# Supplementary material for: Non-ionic photo-acid generators for applications in two-photon lithography
Source: Royal Society of Chemistry journal article supplement (doi:10.1039/b816434g), 2008-12-09
Supplement: b816434g.pdf [file b816434g.pdf]

## Supporting Information

### Non-ionic photo-acid generators for applications in two-photon lithography

Lorenz Steidl<sup>a,d</sup>, Shalin J. Jhaveri<sup>a,b</sup>, Ramakrishnan Ayothi<sup>a</sup>, Jing Sha<sup>a</sup>, Jesse D. McMullen<sup>c</sup>, Sin Yee Cindy Ng<sup>a</sup>, Warren R. Zipfel<sup>c</sup>, Rudolf Zentel<sup>d\*</sup>, and Christopher K. Ober<sup>a\*</sup>

<sup>a</sup>Department of Materials Science and Engineering, Cornell University, Ithaca, NY 14853,

<sup>b</sup>Department of Chemistry and Chemical Biology, Cornell University, Ithaca, NY 14853,

<sup>c</sup>Department of Applied and Engineering Physics, Cornell University, Ithaca, NY 14853

<sup>d</sup>Institute of Organic Chemistry, Department of Chemistry and Pharmacy, University of Mainz, Duesbergweg 10-14, 55128 Mainz, Germany

\* Corresponding authors. Tel: (607) 255-8417 (C.K.O.) Fax: (607) 255-2365 (C.K.O.) E-mail: cober@ccmr.cornell.edu (C.K.O.), Tel: (49-6131)-39-20361 (R.Z.) Fax: (49-6131) 39-24778 (R.Z.) E-mail: zentel@uni-mainz.de (R.Z.).

- <sup>1</sup>H- and <sup>19</sup>F-NMR spectra of PAGs 1-4

- Determination of photoacid formation in solution.

- Determination of photoacid formation in PtBOCS film.

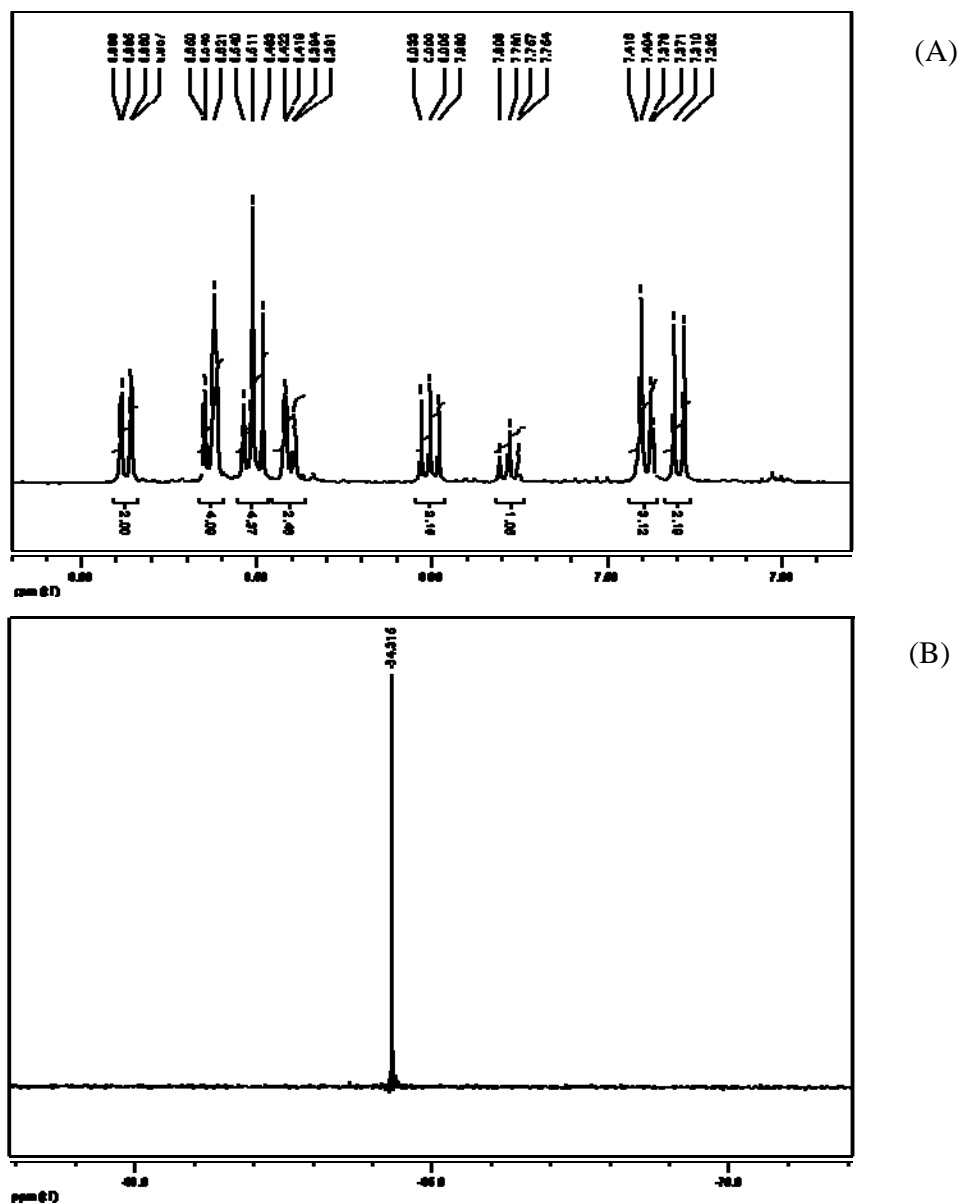

S-Figure 1.  $^1\text{H-NMR}$  (A) and  $^{19}\text{F-NMR}$  (B) spectra of PAG 1.

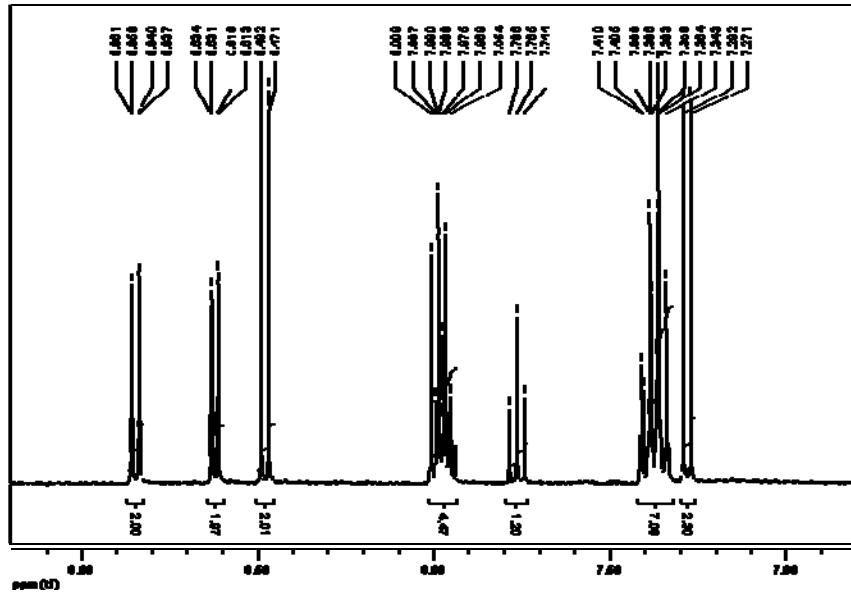

(A)

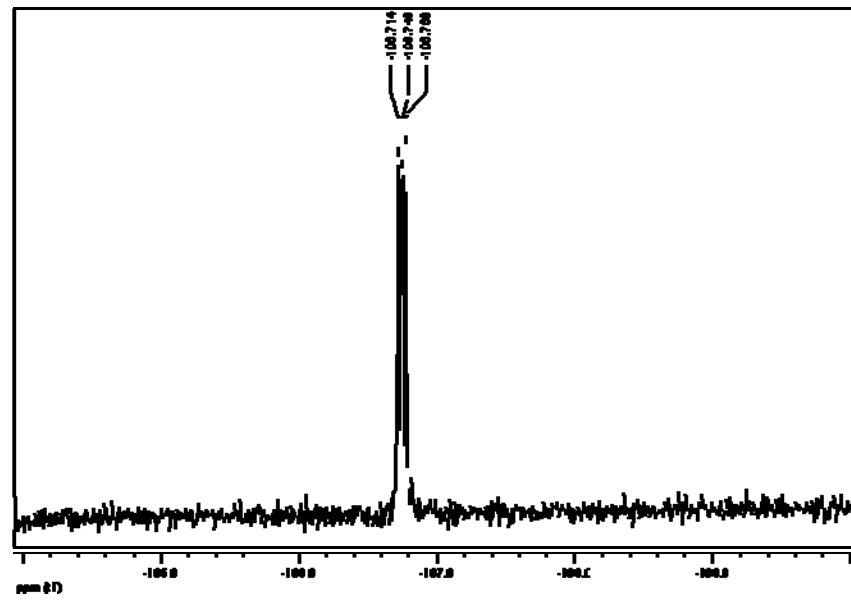

(B)

S-Figure 2.  $^1\text{H-NMR}$  (A) and  $^{19}\text{F-NMR}$  (B) spectra of PAG 2.

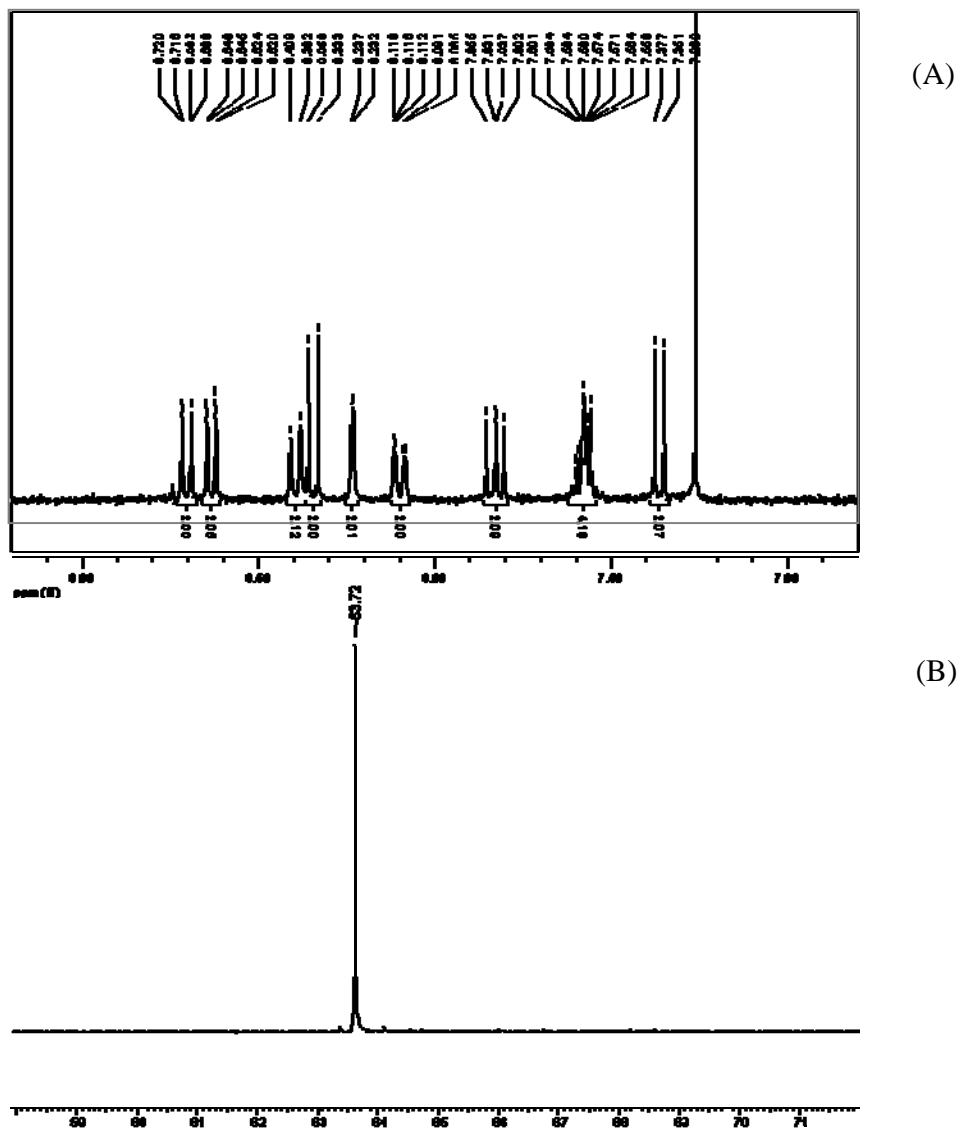

S-Figure 3.  $^1\text{H-NMR}$  (A) and  $^{19}\text{F-NMR}$  (B) spectra of PAG 3.

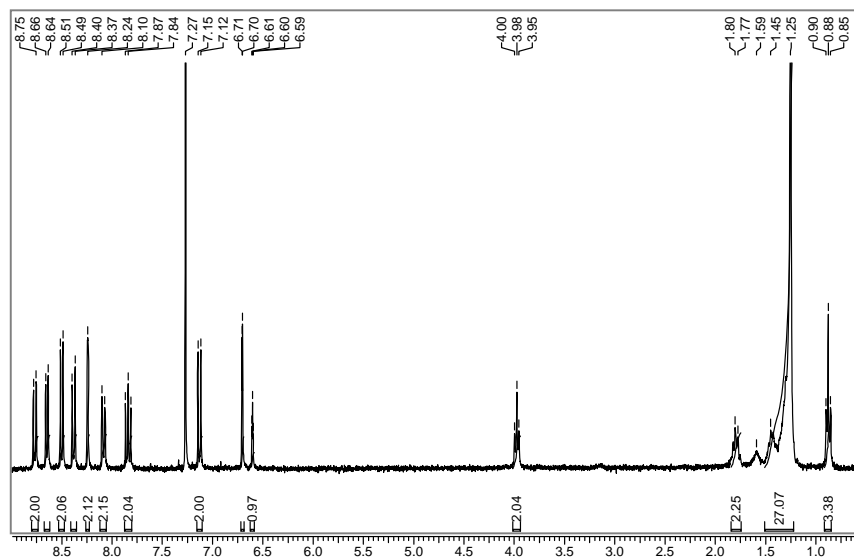

(A)

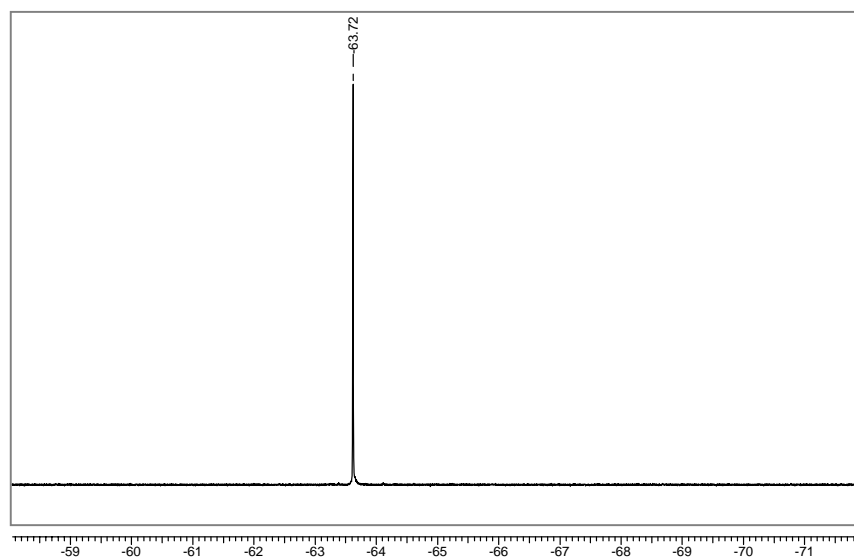

(B)

S-Figure 4.  $^1\text{H}$ -NMR (A) and  $^{19}\text{F}$ -NMR (B) spectra of PAG 4.

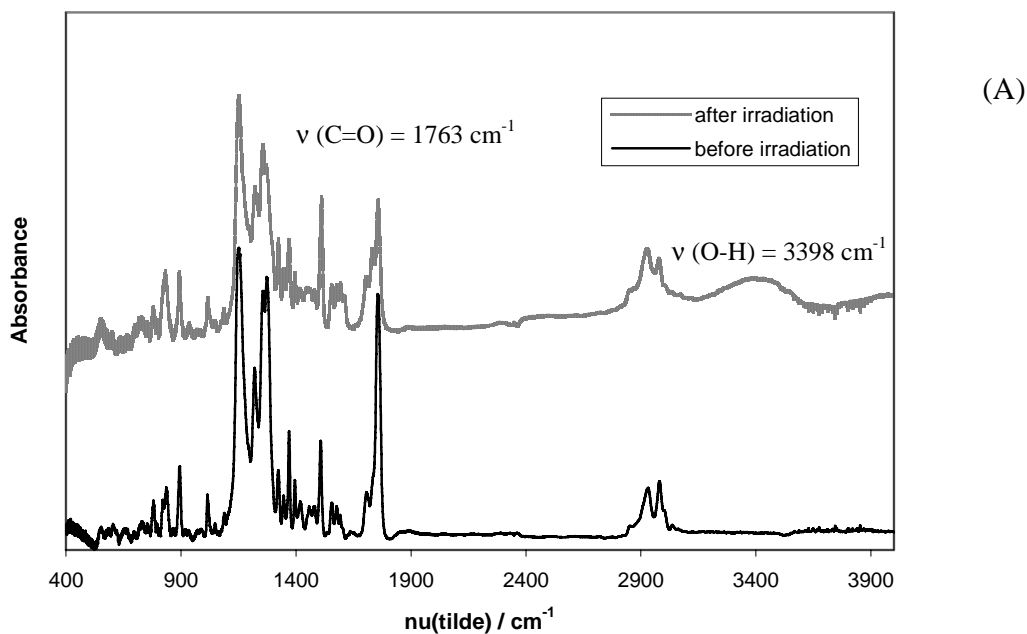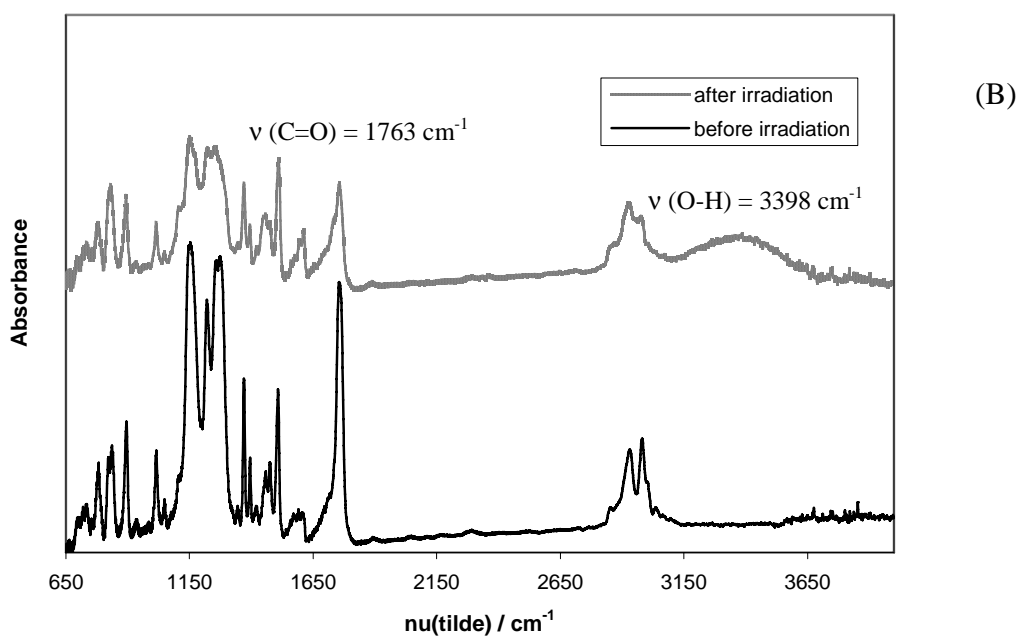

S-Figure 5. FT-IR spectra of PAGs PAG 1 (A) and PAG 2 (B) in polymer film before and after exposure to UV irradiation [Exposure = UVEXS SCU 110B (250 – 750 nm) for 120 sec; Total Lamp Power = 100 mW/cm<sup>2</sup>].

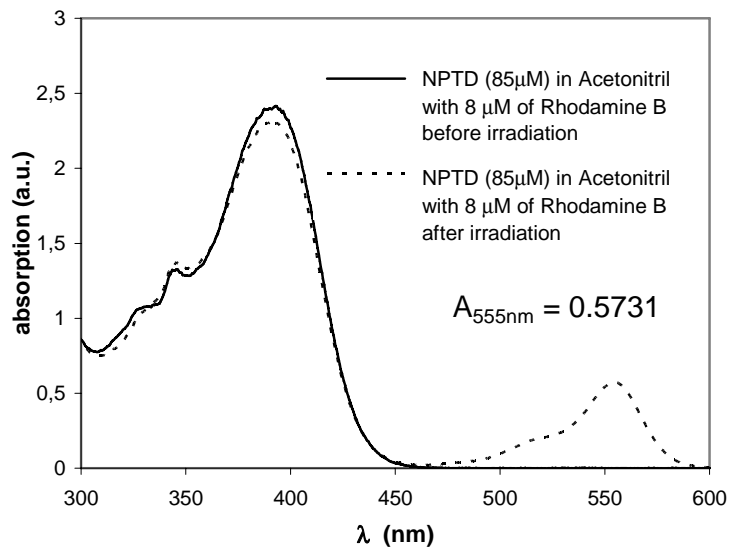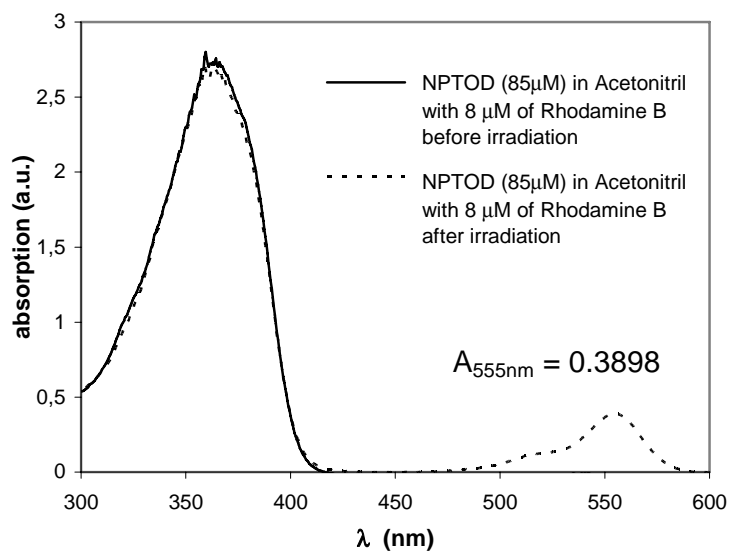

S-Figure 6. UV-Vis spectra of PAGs PAG 3 (A) and PAG 4 (B) in solution before and after exposure to UV irradiation [Exposure = Oriel 68910 Arc Lamp (500 W) for 60 sec using a filter (280-400 nm); lamp power measured with Delo UVA-Meter: 25 mW/cm<sup>2</sup>].
